# Supplementary material for: Anisotropic gold nanoparticles for the highly sensitive colorimetric detection of glucose in human urine
Source: Royal Society of Chemistry journal article supplement (doi:10.1039/c4ra16690f), 2015-01-01
Supplement: c4ra16690f1.pdf [file c4ra16690f1.pdf]

## **Supporting Information**

# **Anisotropic Gold Nanoparticle for the Highly Sensitive Colorimetric Detection of Glucose in Human Urine**

Abhishek Chaudhary, Abhishek Gupta, Chayan Kanti Nandi\*

School of Basic Sciences, Indian Institute of Technology, Mandi, HP-175001

### **Table of Contents:**

Figures (S1-S10)

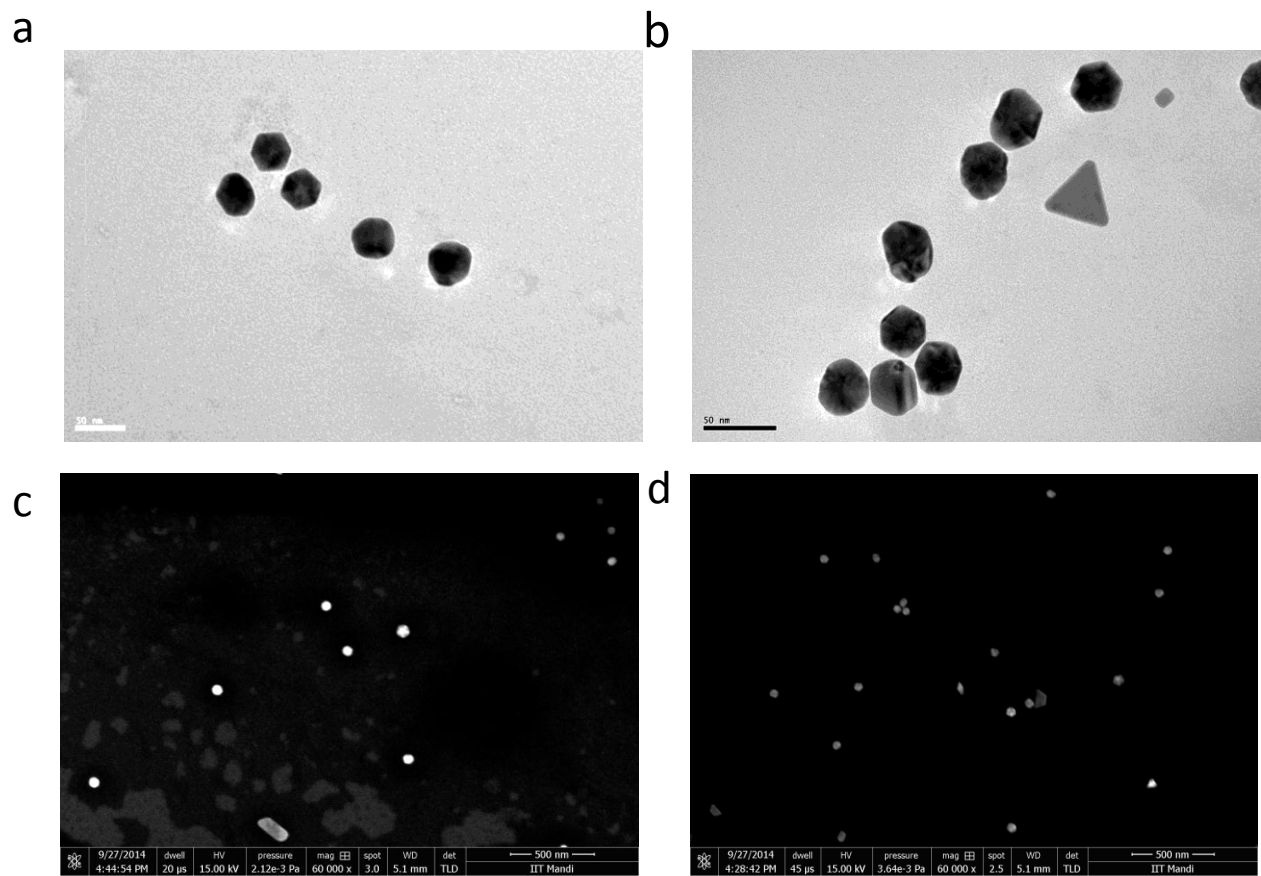

**Figure S1:** TEM images of the (a) as synthesized anisotropic GNPs and (b) PEDOT: PSS surface functionalized GNP. SEM images of the (c) as synthesized anisotropic GNPs and (d) PEDOT: PSS surface functionalized GNP.

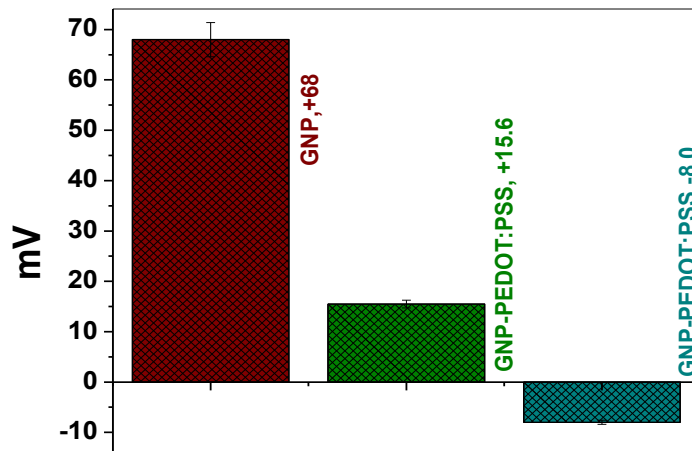

**Figure S2:** Zeta potential ( $\zeta$ ) profiles of the anisotropic GNPs surface functionalized with 1% and 2% PEDOT: PSS respectively.

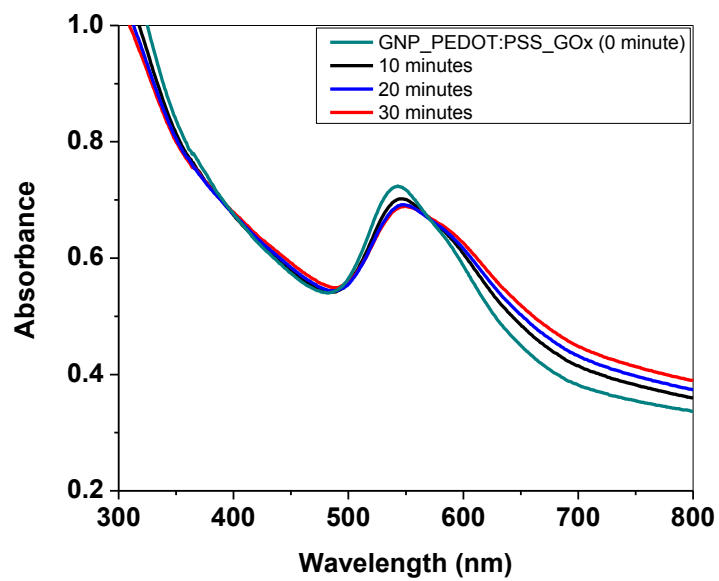

**Figure S3:** UV-Visible absorption spectra of GOx (3mg/mL) conjugated PEDOT: PSS functionalized anisotropic GNP shows change in SPR band even in the absence of Glucose.

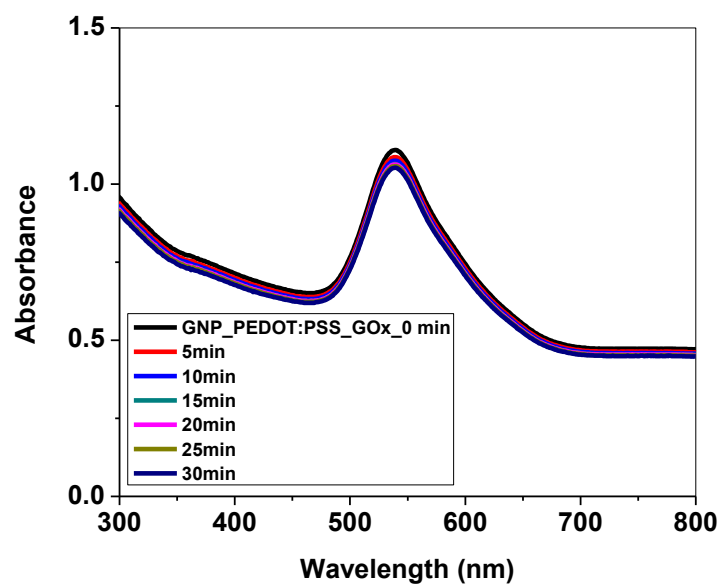

**Figure S4:** UV-Visible absorption spectra of GOx conjugated PEDOT: PSS functionalized anisotropic GNPs shows no changes in SPR band in the absence of Glucose.

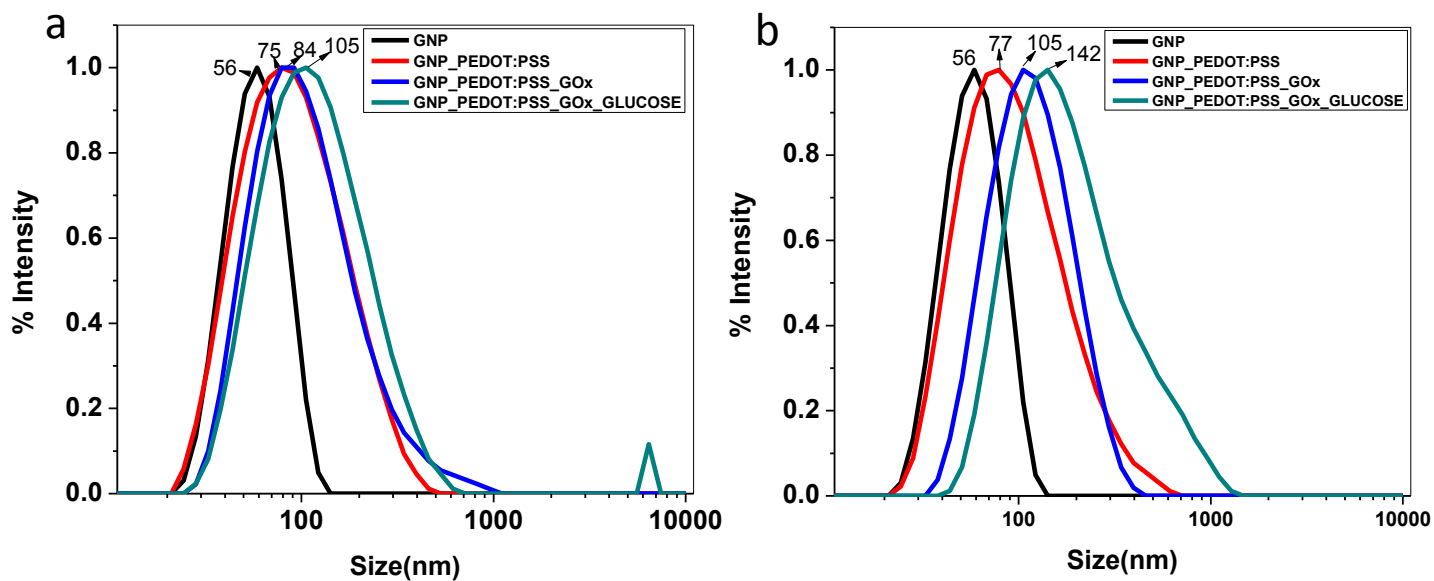

**Figure S5:** Hydrodynamic diameter measured using DLS for the as synthesized anisotropic GNP, with (a) 0.5% PEDOT: PSS modified GNP and GOx conjugated PEDOT: PSS surface functionalized GNPs. (b) 2% PEDOT: PSS modified GNP and GOx conjugated PEDOT: PSS surface functionalized GNPs.

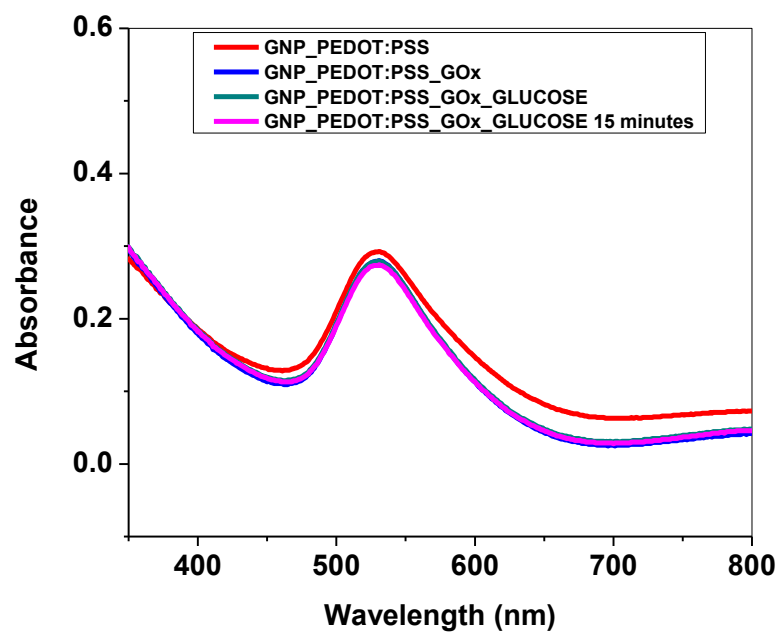

**Figure S6:** UV-Visible absorption spectra of GOx conjugated PEDOT: PSS functionalized spherical GNPs showed no red shift on reacting with 10 $\mu$ g/mL of Glucose standard within 0- 15 minutes of incubation time.

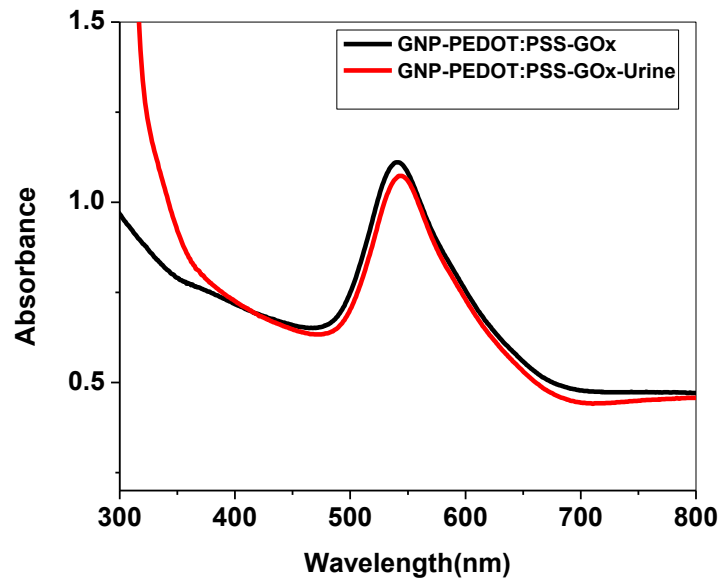

**Figure S7:** UV-Visible absorption spectra of GOx conjugated PEDOT: PSS functionalized anisotropic GNPs (without addition of Glucose) showed no red shift on reacting with Urine sample at neutral pH.



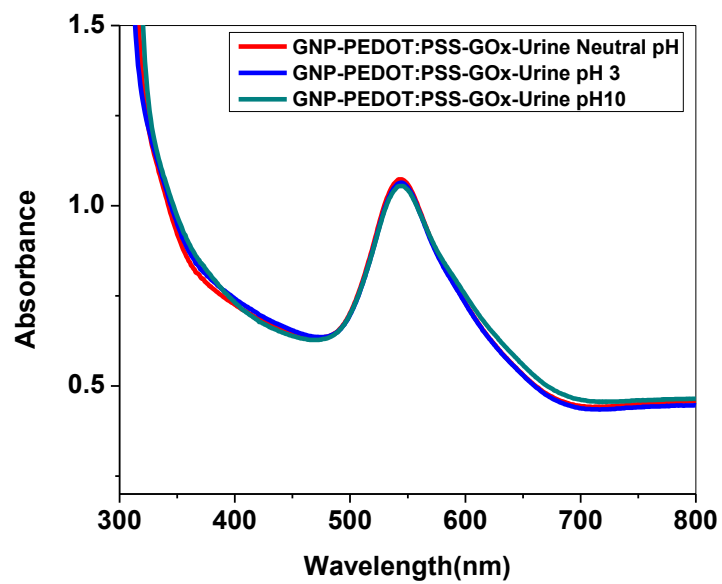

**Figure S8:** UV-Visible absorption spectra of GOx conjugated PEDOT: PSS functionalized anisotropic GNPs showed no red shift on reacting with Urine at acidic (pH-3) and basic pH (pH-10).

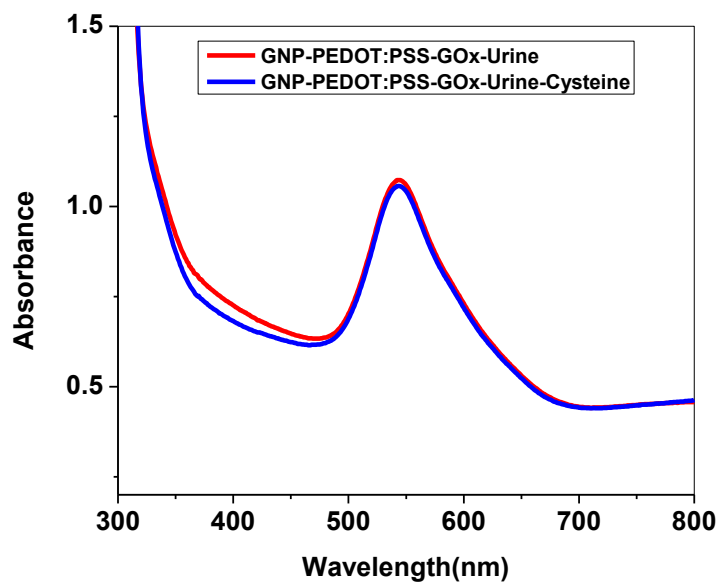

**Figure S9:** UV-Visible absorption spectra of GOx conjugated PEDOT: PSS functionalized anisotropic GNPs shows no red shift on reacting with urine sample spiked with 200 $\mu$ M cysteine.

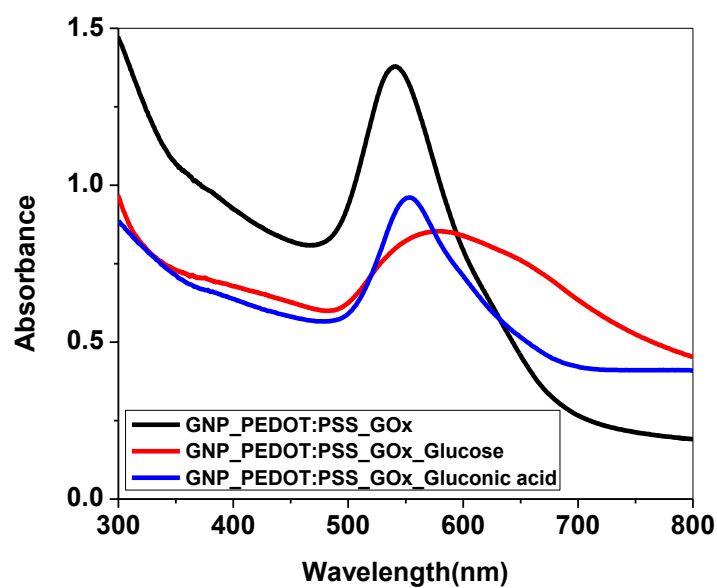

**Figure S10:** UV-Visible absorption spectra of GOx conjugated PEDOT: PSS functionalized anisotropic GNPs showed considerable red shift in the SPR band on reacting with Gluconic acid.
